# Supplementary material for: An organic-halide perovskite-based photo-assisted Li-ion battery for photoelectrochemical storage
Source: Royal Society of Chemistry journal article supplement (doi:10.1039/d2nr02980d), 2022-01-01
Supplement: d2nr02980d1.pdf [file d2nr02980d1.pdf]

## Supporting Information

### Organic-Halide Perovskite-based photo-assisted Li-ion Battery for Photoelectrochemical Storage

#### Supplementary Figures

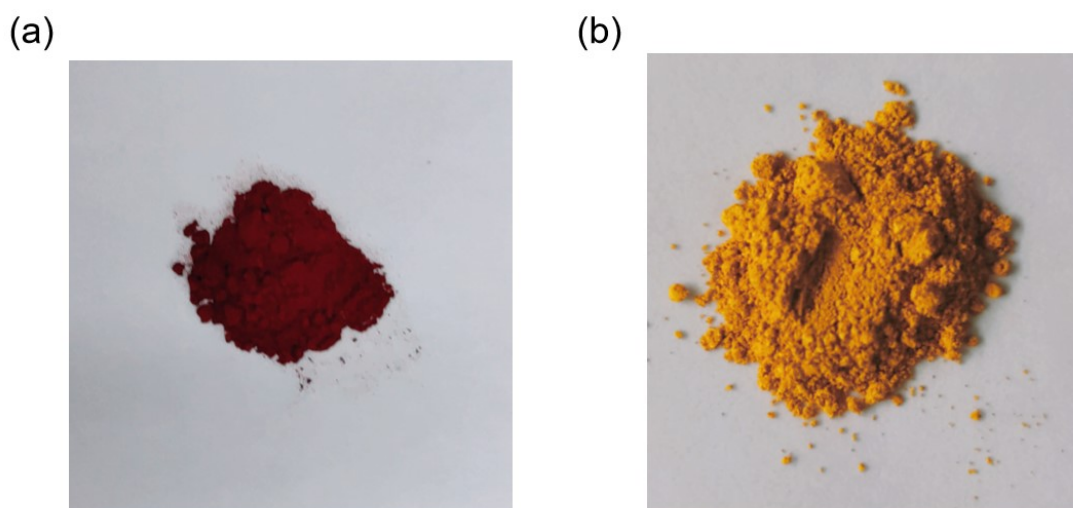

Figure S1. Optical images of (a) DAAQ and (b) DAPbI

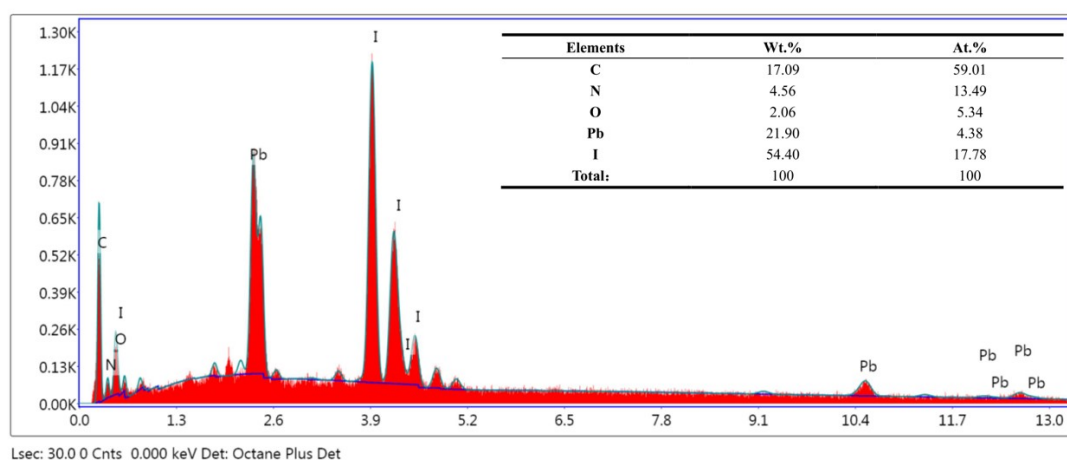

Figure S2. EDS data of DAPbI

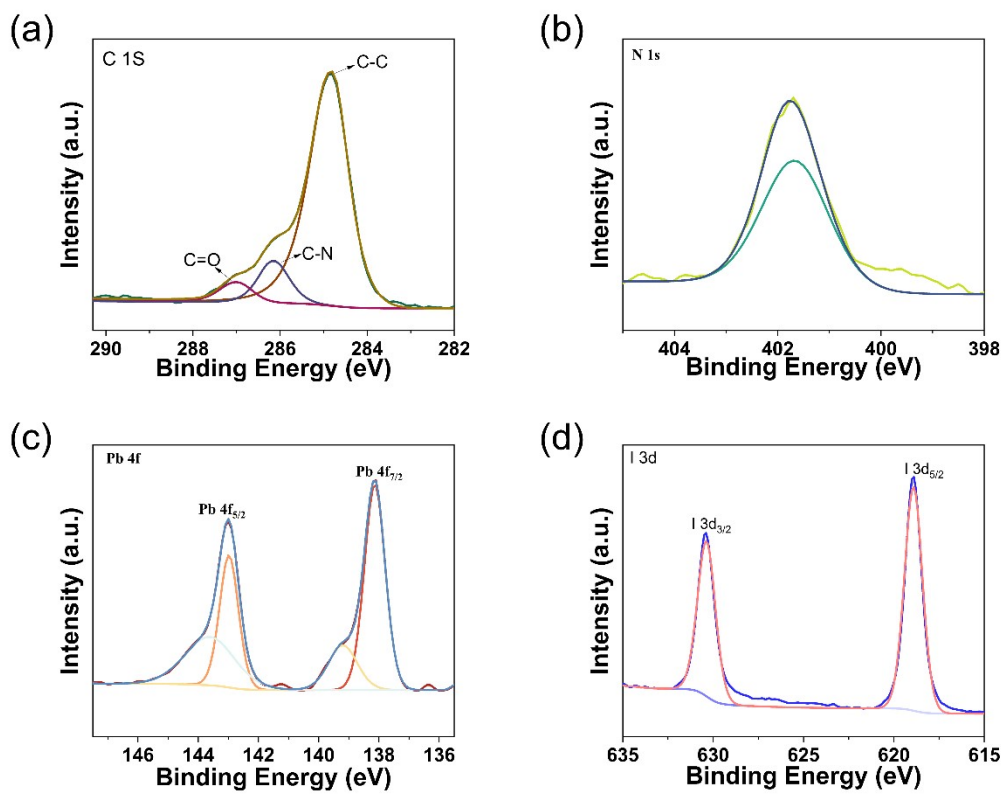

Figure S3. XPS spectra of DAPbI: (a) C 1s; (b) N 1s; (c) Pb 4f; (d) I 3d.

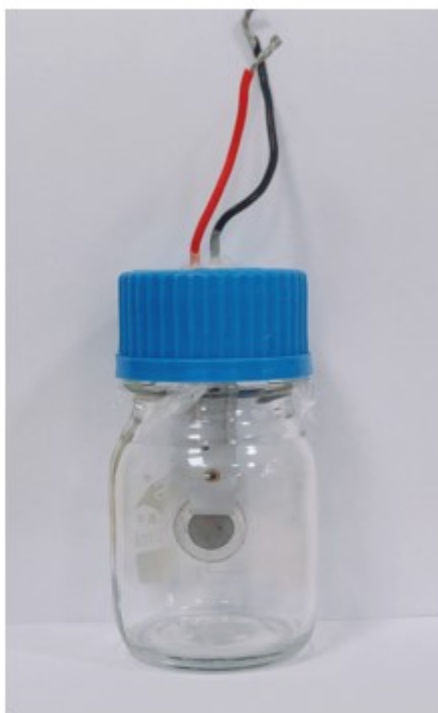

Figure S4. Device for photo-assisted lithium-ion battery

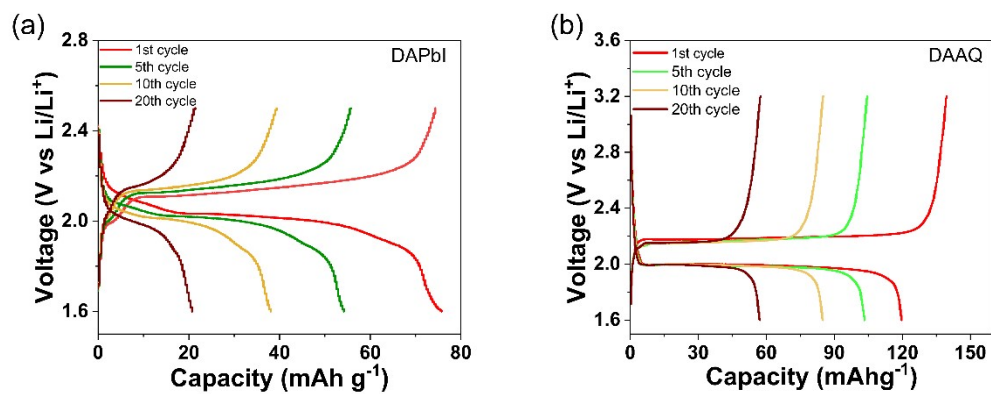

Figure S5. Charge-discharge curves of (a) DAPbI and (b) DAAQ at current density of 20 mA g<sup>-1</sup>

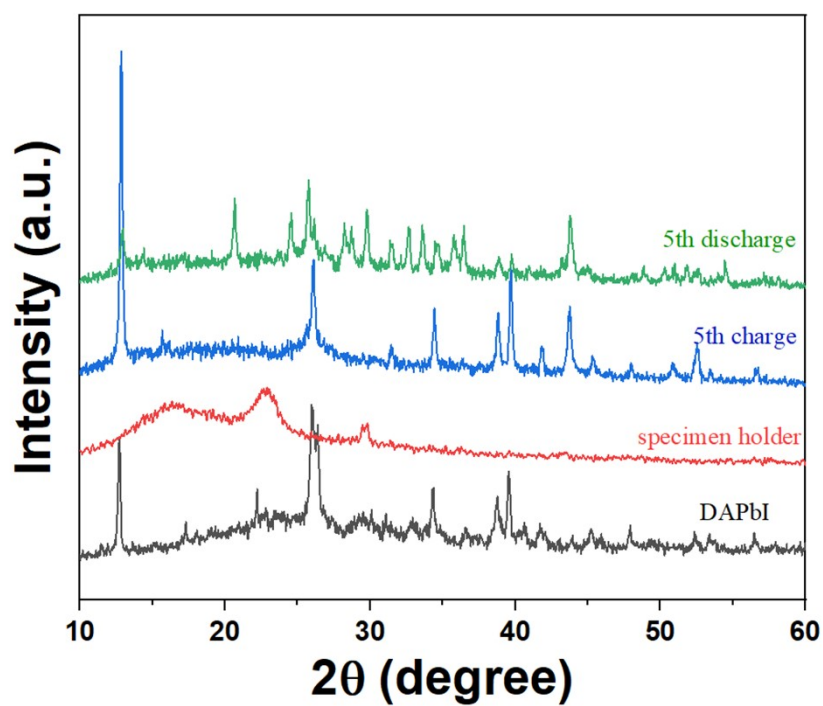

Figure S6. X-ray diffraction patterns for DAPbI after 5th cycling.

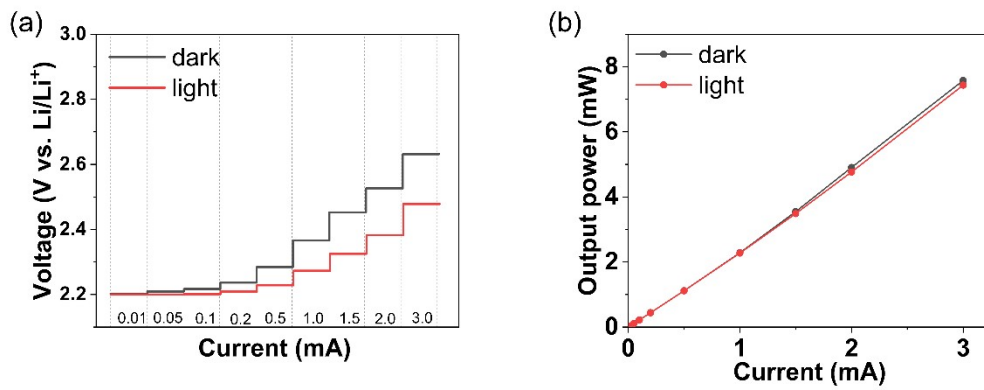

Figure S7. (a) I-V curve of DAAQ during charge. (b) I-P curve of DAAQ during charge.

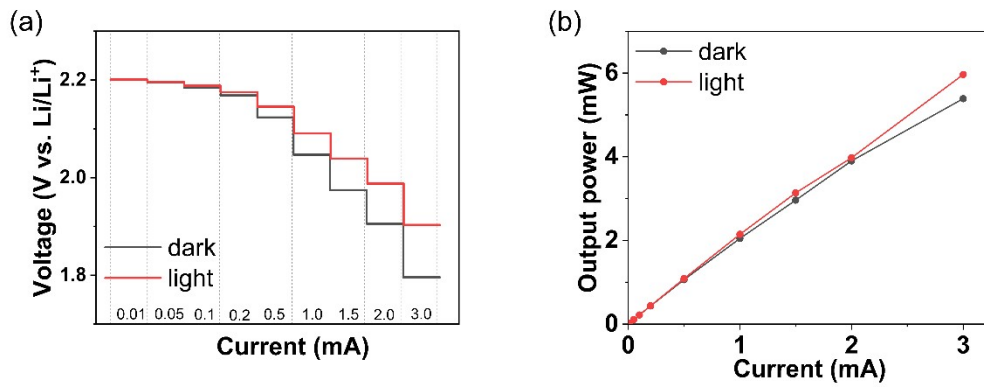

Figure S8. (a) I-V curve of DAAQ during discharge. (b) I-P curve of DAAQ during discharge.
